# Supplementary material for: Resilience in Older People: A Concept Analysis
Source: MDPI journal article supplement (doi:10.3390/healthcare11182491), 2023-09-08
Supplement: s1 [file s1]

Table S1. Included studies and the attributes, antecedents, consequents and empirical elements of concept analysis

| ELEMENTS    | CHARACTERISTICS/CODE                                                                                                                    | LITERATURE DESCRIPTION                                                                                                                                                                                                                                                                                                                                                                                                                                                                                                                                                                                                                                                                         |
|-------------|-----------------------------------------------------------------------------------------------------------------------------------------|------------------------------------------------------------------------------------------------------------------------------------------------------------------------------------------------------------------------------------------------------------------------------------------------------------------------------------------------------------------------------------------------------------------------------------------------------------------------------------------------------------------------------------------------------------------------------------------------------------------------------------------------------------------------------------------------|
| ATTRIBUTES  | Resources available<br><b>A3, D3, E1, F1, I1, R1, R14, H3, R22, S3</b>                                                                  | Environmental Capital; Cultural Capital; Economic Capital; Social Capital; Social Relationships; Family and Friends; Love and Friendship; Having Divine Support; Faith in God; Spirituality.                                                                                                                                                                                                                                                                                                                                                                                                                                                                                                   |
|             | Positive behaviors<br><b>B2, B3, E2, I1, N1, M4, P6, P7, R1, R14, H3, E5, D4, D6, A9, C6, S4</b>                                        | Courage and Strength; Resistance; Hardiness; Positive sense of self and an optimistic outlook on life; Strong positivity demonstrated by identity projects, redemptive sequences and narrative openness; Positive comparison with others; Interpersonal Control; Mastery; Belief in self; Competence; Maintaining purpose; Determination; Sense of purpose; Self-determination; Strives toward goal achievement; Prosocial Behavior; Expressing Gratitude; Sense of Humor; Ability to use humor; Problem-solving skills; Meaningful work and activities; Flexibility; Creativity; Autonomy; Recovery; Sustainability; Warrior; Adaptive; Moving-On; Self-esteem; Esteem; Strong self-efficacy. |
| ANTECEDENTS | Sociodemographic Characteristic<br><b>B1, C5, D1, D2, E3, I1, M3, P4, P8, R2, R3, R9, R10, T1, A9, D4, E6, M5, R17, R20, S2, S3, T6</b> | age (older people > 65 years old, including 80 and over), gender (female and male), education (higher), income (higher) and status marital (have a partner)                                                                                                                                                                                                                                                                                                                                                                                                                                                                                                                                    |
|             | Experiences of Adversity<br><b>A3, B2, B3, B4, C2, C3, E3, F1, M2, M3, N2, M4, P3, P5, P6, R5, R7, R8, R9, E5, I2, P10, R19, S2</b>     | Impaired Health Condition; Deficit Communication; Impaired mental health condition; Impaired social condition; Trauma exposure; Interpersonal; Preconception; Stressor; Chronic pain                                                                                                                                                                                                                                                                                                                                                                                                                                                                                                           |
|             | Life experiences<br><b>A3, A8, B1, B2, B4, M2, R9, T2, P11</b>                                                                          | Contentment with their lives; Lived Experience; Reminiscences; Memories of a past loss can serve purposes of reconciling with ageing through an affirmation of self as resilient; Effective problem-solving history; Wisdom (wisdom attainment; wisdom that comes from having lived a life); Perceived financial situation                                                                                                                                                                                                                                                                                                                                                                     |

|  |                                                                                                                                   |                                                                                                                                                                                                                                                                                                                                                                                                                                                                                                                                                                                                                                                                                                                                                                                                                                                  |
|--|-----------------------------------------------------------------------------------------------------------------------------------|--------------------------------------------------------------------------------------------------------------------------------------------------------------------------------------------------------------------------------------------------------------------------------------------------------------------------------------------------------------------------------------------------------------------------------------------------------------------------------------------------------------------------------------------------------------------------------------------------------------------------------------------------------------------------------------------------------------------------------------------------------------------------------------------------------------------------------------------------|
|  | <p>Physiology factors</p> <p><b>R12, W2</b></p>                                                                                   | <p>Autonomic nervous system, hypothalamic-pituitary axis, innate immunity, renin-angiotensin system, insulin/growth hormone/IGF-1 pathways and their interactions with Genetic, environmental, physiologic, cellular, molecular functions may influence degree of resilience; White matter integrity of the GCC (genu of corpus callosum) and Grit (domain CD-RISC) were association</p>                                                                                                                                                                                                                                                                                                                                                                                                                                                         |
|  | <p>Social context</p> <p><b>B2, B3, C2, C4, D3, G1, H1, I1, M1, P8, R5, R8, R13, U1, U2, W1, A9, B5, E4, H4, P12, R20, T6</b></p> | <p>Personal relationships:<br/>Social competence; Family as support; Family relations; Family cohesion; Secure relationships; Accord relationships; Social relations; Social connectedness; Religiosity; Participation and social cohesion; Friends support (friends and particularly friends in similar circumstances are a great source of support); Family and friend networks; Social networks; Gerotranscendence</p> <p>Environmental support:<br/>Material resources; Social support (social policies, employment, neighbourhood, economy, health, social care e other services, rehabilitation, guide dogs, third sector); Environmental systems; Social and welfare services; Social resources (health and social care); Access to formal support; Community resources; Community level; Housing; Peer support; Engagement with art.</p> |
|  | <p>Intrinsic aspects</p> <p><b>A8, B2, C4, D3, F1, M2, P6, P7, R1, R2, R5, R8, R9, R15, A9, E4, H4, P12, P13</b></p>              | <p>Have purpose or goals:<br/>Capacity building and support provided by case professionals; Moving forward with life; Curiosity/ever-seeking; "Head-On" approach to challenge (study participants expressed the belief that one should make plans when faced with a dilemma and not just sit around waiting for something to happen); Meaningfulness; Maintaining continuity; Having and maintaining interests; Perseverance; Meaning, purpose and growth</p> <p>Maintenance balance:<br/>Perceived Control; Personal control; Equanimity</p> <p>Beliefs:<br/>Spirituality and religiosity; Prayer; Spiritual Grounding</p>                                                                                                                                                                                                                      |
|  | <p>Health conditions</p> <p><b>C2, C5, D3, M1, M4, F1, H2, P3, P4, P5, P7, R2, R14, T4, W1, A10, C6, D5, H3, P12, R20, S2</b></p> | <p>Lifestyle:<br/>Independence and autonomy; Performance preserved from activities of daily living; Mobility; Self-care activities; Looking after yourself (self-care); Self-efficacy; "Self-efficacy, outcome expectations and exercise behavior"; Looking after yourself (self-care); Self-preservation; Self-determination; Non-obese body mass; Non-smoker; Satisfaction with quality of sleep; Having a good appetite; Brain fitness; Self-compassion</p> <p>Express emotions:<br/>Positive emotions; Emotional expression and communication; Emotional regulation; Humor; Hope (low hopelessness scores also predicted greater resilience); Self-esteem; Optimism; Facing fear; Moral compass, ethics, altruism; Cognitive and emotional flexibility; Resignation; Confrontation</p>                                                       |

|             |                                                                                                                                                                                                                                                                          |                                                                                                                                                                                                                                                                                                                                                                                                                                                                                                                                                                                                                                                                                                                                                                                                                                                                                                                                                                                                                                                                                                                                                                                                                                                                                                                                                                     |
|-------------|--------------------------------------------------------------------------------------------------------------------------------------------------------------------------------------------------------------------------------------------------------------------------|---------------------------------------------------------------------------------------------------------------------------------------------------------------------------------------------------------------------------------------------------------------------------------------------------------------------------------------------------------------------------------------------------------------------------------------------------------------------------------------------------------------------------------------------------------------------------------------------------------------------------------------------------------------------------------------------------------------------------------------------------------------------------------------------------------------------------------------------------------------------------------------------------------------------------------------------------------------------------------------------------------------------------------------------------------------------------------------------------------------------------------------------------------------------------------------------------------------------------------------------------------------------------------------------------------------------------------------------------------------------|
|             | <p>Express self-awareness</p> <p>A3, A8, B2, B1, C4, F1, M2, R2, R5, R8, T3</p>                                                                                                                                                                                          | <p>Strong sense of identity; Extending self to others; Ceaseless self-improvement; Accept one-self; Accept situation; Maintenance of self-identity; Adaptable personality; Personal competence; Self and personality; Everyday competence; Self-reliance; Self-reflection (self-criticism and the perception of being caregiver or care receiver) the availability of supportive relationships and reciprocity in these relationships as central elements in the development of resilience; “Maverick” (Being mavericks - unconventional); Existential aloneness.</p>                                                                                                                                                                                                                                                                                                                                                                                                                                                                                                                                                                                                                                                                                                                                                                                               |
| CONSEQUENTS | <p>Components of mental health</p> <p>A2, A6, B4, C3, C5, D1, D2, L1, P1, P6, P7, R6, R10, R15, S1, T1, V1, W2, A10, P11, M5, E5</p>                                                                                                                                     | <p>Control of symptoms psychological:<br/>Less depressive symptoms; Less depression; Less apathy; Less anxiety</p> <p>Control of emotions:<br/>Control of stressful events; Control of stress and negative affect/negative emotion; Stress reduction; Control daily negative emotion; Lower emotional distress; Emotional stability; Express happiness; Maintaining a strong positive self-concept; Express daily positive emotion; Emotional maturity; Gratitude</p>                                                                                                                                                                                                                                                                                                                                                                                                                                                                                                                                                                                                                                                                                                                                                                                                                                                                                               |
|             | <p>Positive perspective and experience of ageing</p> <p>A1, A2, A3, A7, B3, B4, C2, C3, C5, E1, F1, H1, M1, M3, O1, P3, P4, R1, R2, R4, R11, R13, R15, R16, S1, T3, U2, V1, A10, E5, P11, P12, R21, T6, S4, R22, S5, D4, E6, E8, R18, A9, G2, E7, E8, C7, F3, H4, S3</p> | <p>Active aging:<br/>Well-being; Quality of life; Life satisfaction; Successful aging (life satisfaction; morale; health-promoting lifestyle); Self-rated successful ageing; Longevity; Ageing with integrity; Experience an quiet ageing; Savoring life; Being active; Keeping active and busy; Outdoor visits; Walking; Going to churchill</p> <p>Independence and autonomy:<br/>Different strategies to maintain a sense of independence; Fast gait speed; Keep doing a job and earning a living; Resilience demonstrated more protective for risk of dependence for activities of daily livings in older people (65-84 years); Reduced risk of dependence on activities of daily living; Express stoic attitudes (wisdom and moderation) in facing increasing frailty; Driving abilities</p> <p>Values socialization:<br/>Greater social participation; Greater perception social support; Maintain active social (to value intergenerationality and relationship with youngest); Value interaction with friends, family and neighbours; Volunteering</p> <p>Personal behavior:<br/>Personal growth; Purpose in life; Continuity; Perseverance; Self-acceptance; Redemption; Acquiring an empowering perspective; Learning to let go and moving on'; Remaining active and keeping busy; Individual innovativeness; Sense Purpose; Religiosity; Spirituality</p> |

|                           |                                                                                                                                                                                                                                                                                                   |                                                                                                                                                                                                                                                                                                                                                                                                                                                                                                                                                                                                                                                                       |
|---------------------------|---------------------------------------------------------------------------------------------------------------------------------------------------------------------------------------------------------------------------------------------------------------------------------------------------|-----------------------------------------------------------------------------------------------------------------------------------------------------------------------------------------------------------------------------------------------------------------------------------------------------------------------------------------------------------------------------------------------------------------------------------------------------------------------------------------------------------------------------------------------------------------------------------------------------------------------------------------------------------------------|
|                           | <p>Grief and loss experience</p> <p><b>B2, D1, P9, R14, E4</b></p>                                                                                                                                                                                                                                | <p>Recovery with loss; Protection factor against widowhood; They lived active lives, indicating a relatively stable, healthy level of psychological, and physical functioning following the death of their spouse; do not express denial or avoid talking about the loss</p>                                                                                                                                                                                                                                                                                                                                                                                          |
|                           | <p>Coping strategies</p> <p><b>A1, A8, B4, E1, H1, M4, R1, R4, O1, V1, E7, F2, N3, R19</b></p>                                                                                                                                                                                                    | <p>Problem-solving; Coping escape (avoids stressful situations); Practical coping; Emotional coping; Spiritual coping; Problem coping; Emotional coping; Coping styles; Coping resources; Courage and resourcefulness; Speaking it out was expressed as a strategy to relieve hardship; Successfully coping with adversity; Coping with unfavorable situations, recovery and/or maintenance of health, personal and family protection; Strategy of coping with vulnerabilities; Strategy of coping with discrimination; Coping to financial hardship; Coping to nutrition risk</p>                                                                                    |
|                           | <p>Health perspective</p> <p><b>A4, H2, I1, L1, P9, T1, R7, R12, R14, P14, E9</b></p>                                                                                                                                                                                                             | <p>Positive health self-report; Good physical and mental health; Less impact related to the treatment of chronic and acute conditions; Expresses homeostasis conditions and basal levels</p>                                                                                                                                                                                                                                                                                                                                                                                                                                                                          |
|                           | <p>Optimistic perspective</p> <p><b>A6, C1, D3, F1, M1, R2, P11, E4, P12, R18, R21</b></p>                                                                                                                                                                                                        | <p>Optimism; Maintaining a positive outlook on life; Positive reappraisal; Positive Attitude; Express positive and being thankful for life; Happiness; Good humor</p>                                                                                                                                                                                                                                                                                                                                                                                                                                                                                                 |
| <b>EMPIRICAL ELEMENTS</b> | <p>Scales</p> <p><b>A2, A4, A7, C1, C5, H2, M1, N2, P1, P2, P8, R6, R7, V1, W2, M2, I2, R11, B1, R9, T1, T4, E2, D1, A1, R4, T2, P6, P7, P8, B2, D2, S1, P7, L1, C6, E7, P11, P12, R19, R20, S3, S5, A9, E4, E6, F3, G2, P12, S2, F2, P14, A10, B5, C7, H4, N3, P10, R17, H3, D4, D6, P13</b></p> | <p>Connor Davidson Resilience Scale (Four domains - grit, active coping self-efficacy, accommodative coping self-efficacy e spirituality); The Resilience Scale (Two domains - personal competence; acceptance of self and life); Simplified Resilience Score=Leave Behind Questionnaire + Resilience Scale; Brief Resilient Coping Scale; Dispositional Resilience Scale; Groningen Ageing Resilience Inventory; The Hardy-Gill Resilience Scale; Resilience in Older Adults Survey; The Ego-Resilience Scale; John Henry Active Coping level; Psychological Resilience Scale for Adults; Psychological Resilience Against Physical Difficulties Index (PRAPDI).</p> |

|  |                                                                                                                                                                                    |                                                                                                                                                                                                                                                                                                                                                                                                                                                                                                                                                                                                                                                                                                                                                                |
|--|------------------------------------------------------------------------------------------------------------------------------------------------------------------------------------|----------------------------------------------------------------------------------------------------------------------------------------------------------------------------------------------------------------------------------------------------------------------------------------------------------------------------------------------------------------------------------------------------------------------------------------------------------------------------------------------------------------------------------------------------------------------------------------------------------------------------------------------------------------------------------------------------------------------------------------------------------------|
|  | <p>Interventions and qualitative assessment</p> <p>A3, A5, B3, C2, C3, C4, E1, F1, H1, M3, N1, P3, R2, P4, R3, R5, R13, R15, T3, U1, W1, E4, R21, T6, T5, R21, R18, F2, E8, E4</p> | <p>To explore significant life events and experiences; To explore events of adversity and confrontation; To explore resilience; To explore support mechanisms; To measure social support; To measure self-efficacy; To measure self-awareness; To explore physical and cognitive performance; To explore how is it getting old; To explore resilient characteristics.</p> <p>In context of the COVID-19 Pandemic: To explore challenges experienced; How COVID-19 affected their lives; What the changes in that period were; To explore social networks and assistance from government agencies or communities during the pandemic; To explore impact financial hardship during COVID-19; To explore strategies, resources and processes do older adults.</p> |
|--|------------------------------------------------------------------------------------------------------------------------------------------------------------------------------------|----------------------------------------------------------------------------------------------------------------------------------------------------------------------------------------------------------------------------------------------------------------------------------------------------------------------------------------------------------------------------------------------------------------------------------------------------------------------------------------------------------------------------------------------------------------------------------------------------------------------------------------------------------------------------------------------------------------------------------------------------------------|

- A1** Tomás, J. M.; Meléndez, J. C.; Sancho, P.; Mayordomo, T. Adaptation and initial validation of the BRCS in an elderly spanish sample. *Eur J Psychol Assess* **2012**, 28(4), 283–289. <https://doi.org/10.1027/1015-5759/a000108>
- A2** Jeste, D. V.; Savla, G. N.; Thompson, W. K.; Vahia, I. V.; Glorioso, D. K.; Martin, A. S.; Palmer, B. W.; Rock, D.; Golshan, S.; Kraemer, H. C.; Depp, C. A. Association between older age and more successful aging: critical role of resilience and depression. *Am J Psychiatry* **2013**, 170(2), 188–196. <https://doi.org/10.1176/appi.ajp.2012.12030386>
- A3** Browne-Yung, K.; Walker, R. B.; Luszcz, M. A. An examination of resilience and coping in the oldest old using life narrative method. *Gerontologist*, **2015**, 57(2), 282–291. <https://doi.org/10.1093/geront/gnv137>
- A4** Zhang, K.; Zhang, W.; Wu, B.; Liu, S. Anxiety about aging, resilience and health status among Chinese older adults: findings from Honolulu and Wuhan. *Arch Gerontol Geriatr*, **2020**, 104015. <https://doi.org/10.1016/j.archger.2020.104015>
- A5** Browne, C. V.; Mokuau, N.; Braun, K. L. Adversity and resiliency in the lives of native Hawaiian elders. *Social Work* **2009**, 54(3), 253–261. <https://doi.org/10.1093/sw/54.3.253>
- A6** Harris, P. B. Another wrinkle in the debate about successful aging: the undervalued concept of resilience and the lived experience of dementia. *Int J Aging Hum Dev*, **2008**, 67(1), 43–61. <https://doi.org/10.2190/ag.67.1.c>
- A7** Levasseur, M.; Roy, M.; Michallet, B.; St-Hilaire, F.; Maltais, D.; Gagnéux, M. Associations between resilience, community belonging, and social participation among community-dwelling older adults: results from the eastern townships population health survey. *Arch Phys Med Rehabil* **2017**, 98(12), 2422–2432. <https://doi.org/10.1016/j.apmr.2017.03.025>
- A8** Wagnild, G. M.; Collins, J. A. Assessing Resilience. *J Psychosoc Nurs Ment Health Serv* **2009**, 47(12), 28–33. <https://doi.org/10.3928/02793695-20091103-01>
- A9** Ferreira, G. S.; Souto, R. Q.; Almeida, S. A. de; Ribeiro, G. D. S.; Araújo, G. K. N. de; Santos, R. D. C. Assessment of resilience profile and associated factors in community elderly. *Rev. enferm. UERJ* **2020**, 28, e51659. <https://doi.org/10.12957/reuerj.2020.51659>
- A10** Perez-Rojo, G.; López, J.; Noriega, C.; Velasco, C.; Carretero, I.; López-Frutos, P.; Galarraga, L. A multidimensional approach to the resilience in older adults despite COVID-19. *BMC Geriatrics*, **2022**, 22(1). <https://doi.org/10.1186/s12877-022-03472-y>
- B1** Ohana, I.; Golander, H.; Barak, Y. Balancing psychache and resilience in aging Holocaust survivors. *Int Psychogeriatr* **2014**, 26(6), 929–934. <https://doi.org/10.1017/s104161021400012x>
- B2** Van Abbema, R.; Bielderma, A.; de Greef, M.; Hobbelen, H.; Krijnen, W.; Van der Schans, C. Building from a conceptual model of the resilience process during ageing, towards the Groningen Aging Resilience Inventory. *J Adv Nurs* **2015**, 71(9), 2208–2219. <https://doi.org/10.1111/jan.12685>
- B3** Higgins, A.; Sharek, D.; Glacken, M. Building resilience in the face of adversity: navigation processes used by older lesbian, gay, bisexual and transgender adults living in Ireland. *JCN* **2016**, 25(23-24), 3652–3664. <https://doi.org/10.1111/jocn.13288>
- B4** Gattuso, S. Becoming a wise old woman: resilience and wellness in later life. *Health Sociol. Rev.* **2003**, 12(2), 171–177. <https://doi.org/10.5172/hesr.12.2.171>
- B5** da Silva-Sauer, L.; de la Torre-Luque, A.; Smith, B. W.; C. M. C. Lins, M.; Andrade, S.; Fernández-Calvo, B. Brief Resilience Scale (BRS) Portuguese Version: validity and metrics for the older adult population. *Aging Ment Health* **2020**, 1–10. <https://doi.org/10.1080/13607863.2020.1753015>

- C1** Rana, B. K.; Darst, B. F.; Bloss, C.; Shih, P. B.; Depp, C.; Nievergelt, C. M.; Allison, M.; Parsons, J. K.; Schork, N.; Jeste, D. V. Candidate SNP associations of optimism and resilience in older adults: exploratory study of 935 community-dwelling adults. *Am J Geriatr Psychiatry* **2014**, 22(10), 997-1006.e5. <https://doi.org/10.1016/j.jagp.2014.03.009>
- C2** Li, J.; Xu, L.; Chi, I. Challenges and resilience related to aging in the United States among older Chinese immigrants. *Aging Ment Health* **2017**, 22(12), 1548–1555. <https://doi.org/10.1080/13607863.2017.1377686>
- C3** Maercker, A., Hilpert, P., Burri, A. Childhood trauma and resilience in old age: applying a context model of resilience to a sample of former indentured child laborers. *Aging Ment Health* **2015**, 20(6), 616–626. <https://doi.org/10.1080/13607863.2015.1033677>
- C4** Lou, V. W. Q.; Ng, J. W. Chinese older adults' resilience to the loneliness of living alone: a qualitative study. *Aging Ment Health* **2012**, 16(8), 1039–1046. <https://doi.org/10.1080/13607863.2012.692764>
- C5** Laird, K. T.; Lavretsky, H.; Paholpak, P.; Vlasova, R. M.; Roman, M.; Cyr, N. S.; Siddarth, P. Clinical correlates of resilience factors in geriatric depression. *Int Psychogeriatr* **2019**, 31(2), 193–202. <https://doi.org/10.1017/S1041610217002873>
- C6** Carriedo, A.; Cecchini, P. J. A.; Fernandez-Rio, J.; Méndez-Giménez, A. COVID-19, psychological well-being and physical activity levels in older adults during the nationwide lockdown in Spain. *Am J Geriatr Psychiatry* **2020**, 28(11). <https://doi.org/10.1016/j.jagp.2020.08.007>
- C7** Silva-Sauer, L.; Martins-Rodrigues, R.; Torre-Luque, A.; Fernández-Calvo, B. Cross-cultural adaptation and psychometric properties of the Brazilian Portuguese version of successful aging scale in community-dwelling older adults. *J Community Psychol* **2020** <https://doi.org/10.1002/jcop.22374>
- D1** King, B. M.; Carr, D. C.; Taylor, M. G. Depressive symptoms and the buffering effect of resilience on widowhood by gender. *Gerontologist* **2018**, <https://doi.org/10.1093/geront/gny115>
- D2** Mehta, M.; Whyte, E.; Lenze, E.; Hardy, S.; Roumani, Y.; Subashan, P.; Huang, W.; Studenski, S. Depressive symptoms in late life: associations with apathy, resilience and disability vary between young-old and old-old. *Int J Geriatr Psychiatry* **2008**, 23(3), 238–243. <https://doi.org/10.1002/gps.1868>
- D3** Martin, A. S.; Distelberg, B.; Palmer, B. W., & Jeste, D. V. Development of a new multidimensional individual and interpersonal resilience measure for older adults. *Aging Ment Health* **2014**, 19(1), 32–45. <https://doi.org/10.1080/13607863.2014.909383>
- D4** Kemer, A. S.; Gökalp, K. Determination of the effects of innovativeness levels of the elderly on their psychological resilience. *Perspect Psychiatr Care* **2020**. <https://doi.org/10.1111/ppc.12629>
- D5** Pedone, C.; Costanzo, L.; Finamore, P.; Bandinelli, S.; Ferrucci, L.; Antonelli Incalzi, R. Defining resilience in older people: does a subjective definition of stressor work? *J Gerontol A Biol Sci Med Sci*. **2020** <https://doi.org/10.1093/gerona/glaa189>
- D6** Li, Y.-T.; Ow, Y. S. Y. Development of resilience scale for older adults. *Aging Ment Health* **2021**, 26:1, 159-158. <https://doi.org/10.1080/13607863.2020.1861212>
- E1** Manning, L. K. Enduring as lived experience: exploring the essence of spiritual resilience for women in late life. *J Relig Health* **2012**, 53(2), 352–362. <https://doi.org/10.1007/s10943-012-9633-6>
- E2** Windle, G.; Markland, D. A.; Woods, R. T. Examination of a theoretical model of psychological resilience in older age. *Aging Ment Health* **2008**, 12(3), 285–292. <https://doi.org/10.1080/13607860802120763>

**E3** Hildon, Z.; Smith, G.; Netuveli, G.; Blane, D. Understanding adversity and resilience at older ages. *Sociol Health Illn* **2008**, 30(5), 726–740. <https://doi.org/10.1111/j.1467-9566.2008.01087.x>

**E4** Shen, S.-F.; Lee, S.-Y.; Tung, H.-H.; Hsu, S.-F. Effect of negative life events and resilience on health status of older adults with possible sarcopenia: a qualitative research. *Int J Gerontol* **2021**, 15, 367–371. [https://doi.org/10.6890/IJGE.202110\\_15\(4\).0014](https://doi.org/10.6890/IJGE.202110_15(4).0014)

**E5** Manning, L. K.; Bouchard, L. Encounters with adversity: a framework for understanding resilience in later life. *Ageing Ment Health* **2019**, 24(7), 1–8. <https://doi.org/10.1080/13607863.2019.1594162>

**E6** St. Louis, R. M.; Koppel, S.; Molnar, L. J.; Di Stefano, M.; Darzins, P.; Porter, M. M.; Bédard, M.; Mullen, N.; Myers, A.; Marshall, S.; Charlton, J. L. Examining the contribution of psychological resilience on self-reported and naturalistic driving behavior of older adults. *J Safety Res* **2022**, 82, 251–260. <https://doi.org/10.1016/j.jsr.2022.06.001>

**E7** Mao, W.; Wu, B.; Chi, I.; Yang, W.; Dong, X. Experiences of discrimination and oral health-related quality of life among foreign-born older Chinese Americans: does resilience play a mediating role? *Community Dent Oral Epidemiol* **2021**. <https://doi.org/10.1111/cdoe.12723>

**E8** Lee, K.; Hyun, K.; Mitchell, J.; Saha, T.; Oran Gibson, N.; Krejci, C. Exploring factors enhancing resilience among marginalized older adults during the COVID-19 pandemic. *J Appl Gerontol*, **2021**, 073346482110487. <https://doi.org/10.1177/07334648211048749>

**F1** Ottmann, G.; Maragoudaki, M. Fostering resilience later in life: a narrative approach involving people facing disabling circumstances, carers and members of minority groups. *Ageing Soc* **2014**, 35(10), 2071–2099. <https://doi.org/10.1017/s0144686x14000828>

**F2** Taylor, M. G.; Carr, D. C.; Jason, K. Financial hardship and psychological resilience during COVID-19: differences by race/ethnicity. *J Gerontol B Psychol Sci Soc Sci* **2021**. <https://doi.org/10.1093/geronb/gbab173>

**F3** Salamene, L. C.; Martins, E. L. M.; Lucchetti, G.; Lucchetti, A. L. G. Factors associated with successful aging in Brazilian community-dwelling older adults: when physical health is not enough. *Geriatr Nurs* **2021**, 42(2), 372–378. <https://doi.org/10.1016/j.gerinurse.2021.01.009>

**G1** Yee-Melichar, D.; Boyle, A. R.; Wanek, L. J.; Pawlowsky, S. B. Geriatric rehabilitation and resilience from a cultural perspective. *Geriatr Nurs* **2014**, 35(6), 451-454.e9. <https://doi.org/10.1016/j.gerinurse.2014.08.010>

**G2** Mendoza, A. N.; Fruhauf, C. A.; MacPhee, D. Grandparent caregivers' resilience: stress, support, and coping predict life satisfaction. *Int J Aging Hum Dev* **2019**, 91(1), 3–20. <https://doi.org/10.1177/0091415019843459>

**H1** Kwong, K.; Du, Y.; Xu, Q. Healthy aging of minority and immigrant populations: resilience in late life. *Traumatology* **2015**, 21(3), 136–144. <https://doi.org/10.1037/trm0000034>

**H2** McKibbin, C.; Lee, A.; Steinman, B. A.; Carrico, C.; Bourassa, K.; Slosser, A. Health status and social networks as predictors of resilience in older adults residing in rural and remote environments. *J Aging Res* **2016**, <https://doi.org/10.1155/2016/4305894>

**H3** Wister, A.; Cosco, T.; Mitchell, B.; Fyffe, I; Health behaviors and multimorbidity resilience among older adults using the Canadian Longitudinal Study on Aging. *International Psychogeriatrics*, **2019**, 1–15. <https://doi.org/10.1017/s1041610219000486>

**H4** Gallardo-Peralta, L. P.; Mayorga Muñoz, C.; Soto Higuera, A. Health, social support, resilience and successful ageing among older Chilean adults. *Int Soc Work* **2020**, 65:2, 283-299 <https://doi.org/10.1177/0020872819901147>



- I1** Mhaka-Mutepfa, M.; Mpofu, E.; Cumming, R. Impact of protective factors on resilience of grandparent carers fostering orphans and non-orphans in Zimbabwe. *J Aging Health* **2014**, *27*(3), 454–479. <https://doi.org/10.1177/0898264314551333>.
- I2** Chhetri, J. K.; Xue, Q. L.; Ma, L.; Chan, P.; Varadhan, R. Intrinsic capacity as a determinant of physical resilience in older adults. *J Nutr Health Aging* **2021**, <https://doi.org/10.1007/s12603-021-1629-z>
- L1** Gupta, S.; Bélanger, E.; Phillips, S. P. Low socioeconomic status but resilient: panacea or double trouble? John Henryism in the International IMIAS study of older adults. *J Cross Cult Gerontol* **2018**, *34*(1), 15–24. <https://doi.org/10.1007/s10823-018-9362-8>
- M1** Lamond, A. J.; Depp, C. A.; Allison, M.; Langer, R.; Reichstadt, J.; Moore, D. J.; Golshan, S.; Ganiats, T. G.; Jeste, D. V. Measurement and predictors of resilience among community-dwelling older women. *J Psychiatr Res* **2008**, *43*(2), 148–154. <https://doi.org/10.1016/j.jpsychires.2008.03.007>
- M2** Yang, F.; Bao, J. M.; Huang, X. H.; Guo, Q.; Smith, G. D. Measurement of resilience in Chinese older people. *Int Nurs Rev* **2015**, *62*(1), 130–139. <https://doi.org/10.1111/inr.12168>
- M3** Koren, C. Men's vulnerability–women's resilience: from widowhood to late-life repartnering. *Int Psychogeriatr* **2015**, *28*(5), 719–731. <https://doi.org/10.1017/s1041610215002240>
- M4** Pathike, W.; O'Brien, A. P.; Hunter, S. Moving on from adversity: an understanding of resilience in rural Thai older people. *Aging Ment Health* **2017**, *23*(3), 311–318. <https://doi.org/10.1080/13607863.2017.1411883>
- M5** Wister, A.; Li, L.; Cosco, T. D.; McMillan, J.; Griffith, L. E.; Costa, A.; Anderson, L.; Balion, C.; Kirkland, S.; Yukiko, A.; Wolfson, C.; Basta, N.; Cossette, B.; Levasseur, M.; Hofer, S.; Paterson, T.; Hogan, D.; Liu-Ambrose, T.; Menec, V.; St. John, P. Multimorbidity resilience and COVID-19 pandemic self-reported impact and worry among older adults: a study based on the Canadian Longitudinal Study on Aging (CLSA). *BMC Geriatrics* **2022**, *22*(1). <https://doi.org/10.1186/s12877-022-02769-2>
- M6** Wister, A.; Cosco, T.; Mitchell, B.; Fyffe, I. Health behaviors and multimorbidity resilience among older adults using the Canadian Longitudinal Study on Aging. *Int Psychogeriatr* **2019**, 1–15. <https://doi.org/10.1017/s1041610219000486>
- N1** Randall, W.; Baldwin, C.; McKenzie-Mohr, S.; McKim, E.; Furlong, D. Narrative and resilience: a comparative analysis of how older adults story their lives. *J Aging Stud* **2015**, *34*, 155–161. <https://doi.org/10.1016/j.jaging.2015.02.010>
- N2** Laird, K. T.; Lavretsky, H.; St. Cyr, N.; Siddarth, P. Resilience predicts remission in antidepressant treatment of geriatric depression. *Int J Geriatr Psychiatry* **2018**, *33*(12), 1596–1603. <https://doi.org/10.1002/gps.4953>
- N3** Capicio, M.; Panesar, S.; Keller, H.; Gramlich, L.; Popeski, N.; Basualdo-Hammond, C.; Atkins, M.; Chan, C. B. Nutrition risk, resilience and effects of a brief education intervention among community-dwelling older adults during the COVID-19 pandemic in Alberta, Canada. *Nutrients* **2022**, *14*(5), 1110. <https://doi.org/10.3390/nu14051110>
- O1** Moyle, W.; Clarke, C.; Gracia, N.; Reed, J.; Cook, G.; Klein, B.; Marais, S.; Richardson, E. Older people maintaining mental health well-being through resilience: an appreciative inquiry study in four countries. *J Nurs Healthc Chronic Illn* **2010**, *2*(2), 113–121. <https://doi.org/10.1111/j.1752-9824.2010.01050.x>
- P1** Zhong, X.; Wu, D.; Nie, X.; Xia, J.; Li, M.; Lei, F.; Lim, H. A.; Kua, E.-H.; Mahendran, R. Parenting style, resilience, and mental health of community-dwelling elderly adults in China. *BMC Geriatrics*, **2016**, *16*(1). <https://doi.org/10.1186/s12877-016-0308-0>

- P2** Kohler, S.; Loh, S. M. Patient resilience in the fracture orthopaedic rehabilitation geriatric environment. *Australas J Ageing* **2016**, 36(1), 65–68. <https://doi.org/10.1111/ajag.12362>
- P3** Ribeiro, M. dos S.; Borges, M. da S. Perceptions of aging and falling ill: a study with elderly persons in palliative care. *Revista Brasileira de Geriatria e Gerontologia* **2018**, 21(6), 701–710. <https://doi.org/10.1590/1981-22562018021.180139>
- P4** Yang, Y.; Wen, M. Psychological resilience and the onset of activity of daily living disability among older adults in China: a nationwide longitudinal analysis. *J Gerontol B Psychol Sci Soc Sci* **2014**, 70(3), 470–480. <https://doi.org/10.1093/geronb/gbu068>
- P5** Gooding, P. A.; Hurst, A.; Johnson, J.; Tarrier, N. Psychological resilience in young and older adults. *Int J Geriatr Psychiatry* **2011**, 27(3), 262–270. <https://doi.org/10.1002/gps.2712>
- P6** O'Rourke, N.; Kupferschmidt, A. L.; Claxton, A.; Smith, J. Z.; Chappell, N.; Beattie, B. L. Psychological resilience predicts depressive symptoms among spouses of persons with Alzheimer disease over time. *Aging Ment Health* **2010**, 14(8), 984–993. <https://doi.org/10.1080/13607863.2010.501063>
- P7** Ong, A. D.; Bergeman, C. S.; Bisconti, T. L.; Wallace, K. A. Psychological resilience, positive emotions, and successful adaptation to stress in later life. *J Pers Soc Psychol* **2006**, 91(4), 730–749. <https://doi.org/10.1037/0022-3514.91.4.730>
- P8** Diamond, S.; Shrira, A. Psychological vulnerability and resilience of Holocaust survivors engaged in creative art. *Psychiatry Research* **2018** 264, 236–243. <https://doi.org/10.1016/j.psychres.2018.04.013>
- P9** Bonanno, G. A.; Wortman, C. B.; Nesse, R. M. Prospective patterns of resilience and maladjustment during widowhood. *Psychol Aging* **2004**, 19(2), 260–271. <https://doi.org/10.1037/0882-7974.19.2.260>
- P10** Zaidel, C.; Musich, S.; Karl, J.; Kraemer, S.; Yeh, C. S. Psychosocial factors associated with sleep quality and duration among older adults with chronic pain. *Popul Health Manag* **2020**. <https://doi.org/10.1089/pop.2019.0165>
- P11** Tourunen, A.; Siltanen, S.; Saajanaho, M.; Koivunen, K.; Kokko, K.; Rantanen, T. Psychometric properties of the 10-item Connor–Davidson resilience scale among finnish older adults. *Aging Ment Health*, **2019** 1–8. <https://doi.org/10.1080/13607863.2019.1683812>
- P12** Kusz, H.; Ahmad, A. Preserving engagement, nurturing resilience. *Clin Geriatr Med* **2020**. <https://doi.org/10.1016/j.cger.2020.06.004>
- P13** Asch, R. H.; Kachadourian, L.; Southwick, S. M.; Esterlis, I.; Pietrzak, R. H. Psychological resilience to the challenges of physical aging in older U.S. veterans: results from the 2019-2020 National Health and Resilience in Veterans Study. *Am J Geriatr Psychiatry* **2021** <https://doi.org/10.1016/j.jagp.2021.04.013>
- P14** Taylor, M. G.; Carr, D. Psychological resilience and health among older adults: a comparison of personal resources. *J Gerontol B Psychol Sci Soc Sci*. **2020** <https://doi.org/10.1093/geronb/gbaa116>
- R1** Reis, L. A. dos; Menezes, T. M. de O. Religiosity and spirituality as resilience strategies among long-living older adults in their daily lives. *Rev Bras Enferm*, **2017** 70(4), 761–766. <https://doi.org/10.1590/0034-7167-2016-0630>
- R2** Wagnild, G.; Young, H. M. Resilience among older women. *J Nurs Scholarsh*, **1990**, 22(4), 252–255. <https://doi.org/10.1111/j.1547-5069.1990.tb00224.x>
- R3** Bennett, K. M.; Reyes-Rodriguez, M. F.; Altamar, P.; Soulsby, L. K. Resilience amongst older colombians living in poverty: an ecological approach. *J Cross Cult Gerontol*, **2016**, 31(4), 385–407. <https://doi.org/10.1007/s10823-016-9303-3>

- R4** Tomás, J. M.; Sancho, P.; Melendez, J. C.; Mayordomo, T. Resilience and coping as predictors of general well-being in the elderly: a structural equation modeling approach. *Aging Ment Health*, **2012** 16(3), 317–326. <https://doi.org/10.1080/13607863.2011.615737>
- R5** Kinsel, B. Resilience as adaptation in older women. *J Women Aging* **2005**, 17(3), 23–39. [https://doi.org/10.1300/j074v17n03\\_03](https://doi.org/10.1300/j074v17n03_03)
- R6** Laird, K. T.; Lavretsky, H.; St. Cyr, N.; Siddarth, P. Resilience predicts remission in antidepressant treatment of geriatric depression. *Int J Geriatr Psychiatry*, **2018** 33(12), 1596–1603. <https://doi.org/10.1002/gps.4953>
- R7** Smith, P. R. Resilience: resistance factor for depressive symptom. *J Psychiatr Ment Health Nurs* **2009** 16(9), 829–837. <https://doi.org/10.1111/j.1365-2850.2009.01463.x>
- R8** Montpetit, M. A.; Bergeman, C. S.; Deboeck, P. R.; Tiberio, S. S.; Boker, S. M. Resilience as process: negative affect, stress, and coupled dynamical systems. *Psychology and Aging*, **2010**, 25(3), 631–640. <https://doi.org/10.1037/a0019268>
- R9** Nygren, B.; Aléx, L.; Jonsén, E.; Gustafson, Y.; Norberg, A.; Lundman, B. Resilience, sense of coherence, purpose in life and self-transcendence in relation to perceived physical and mental health among the oldest old. *Aging Ment Health* **2005** (4), 354–362. <https://doi.org/10.1080/1360500114415>
- R10** Lim, M. L.; Lim, D.; Gwee, X.; Nyunt, M. S. Z.; Kumar, R.; Ng, T. P. Resilience, stressful life events, and depressive symptomatology among older Chinese adults. *Aging Ment Health* **2015** 19(11), 1005–1014. <https://doi.org/10.1080/13607863.2014.995591>
- R11** Wells, M.; Avers, D.; Brooks, G. Resilience, physical performance measures, and self-perceived physical and mental health in older catholic nuns. *J Geriatr Phys Ther* **2012** 35(3), 126–131. <https://doi.org/10.1519/jjpt.0b013e318237103f>
- R12** Hadley, E. C.; Kuchel, G. A.; Newman, A. B.; Allore, H. G.; Bartley, J. M.; Bergeman, C. S.; Blinov, M. L.; Colon-Emeric, C. S.; Dabhar, F. S.; Dugan, L. L.; Dutta, C.; Eldadah, B. A.; Ferrucci, L.; Kirkland, J. L.; Kritchevsky, S. B.; Lipsitz, L. A.; Nadkarni, N. K.; Reed, M. J.; Schmader, K. E.; Sierra, F. Report: NIA Workshop on measures of physiologic resiliencies in human aging. *J Gerontol A Biol Sci Med Sci* **2017** 72(7), 980–990. <https://doi.org/10.1093/gerona/glx015>
- R13** Thetford, C.; Bennett, K. M.; Hodge, S.; Knox, P. C.; Robinson, J. Resilience and vision impairment in older people. *J Aging Stud* **2015** 35, 37–48. <https://doi.org/10.1016/j.jaging.2015.07.007>
- R14** Resnick, B. Resilience in older adults. *Top Geriatr Rehabil* **2014**, 30(3), 155–163. <https://doi.org/10.1097/tgr.0000000000000024>
- R15** Diehl, M.; Hay, E. L. Risk and resilience factors in coping with daily stress in adulthood: the role of age, self-concept incoherence, and personal control. *Developmental Psychology* **2010**, 46(5), 1132–1146. <https://doi.org/10.1037/a0019937>
- R16** Wagnild, G. Resilience and successful aging: comparison among low and high income older adults. *J Gerontol Nurs* **2003**, 29(12), 42–49. <https://doi.org/10.3928/0098-9134-20031201-09>
- R17** Silva-Sauer, L.; Basso Garcia, R.; Pereira da Silva, T. M.; Barbosa de Melo, C.; Fernández-Calvo, B. Relationship between psychological resilience, perceived stress, depression, and physical health in community-dwelling older adults. *Psychol Neurosci* **2021**, 14(2), 132–144. <https://doi.org/10.1037/pne0000254>

- R18** Herron, R. V.; Lawrence, B. C.; Newall, N. E. G.; Ramsey, D.; Waddell- Henowitch, C. M.; Dauphinais, J. Rural older adults' resilience in the context of COVID-19. *Soc. sci. med.* **2022**, 306, 115153. <https://doi.org/10.1016/j.socscimed.2022.115153>
- R19** Zapater-Fajará, M.; Crespo-Sanmiguel, I.; Pulopulos, M. M.; Hidalgo, V.; Salvador, A. Resilience and psychobiological response to stress in older people: the mediating role of coping strategies. *Front Aging Neurosci* **2021**, 13. <https://doi.org/10.3389/fnagi.2021.632141>
- R20** Liu, Z.; Zhou, X.; Zhang, W.; Zhou, L. Resilience and its correlates among first ischemic stroke survivors at acute stage of hospitalization from a tertiary hospital in China: a cross-sectional study. *Aging Ment Health* **2018**, 24(5), 828–836. <https://doi.org/10.1080/13607863.2018.1550630>
- R21** Silva Júnior, E. G. da; Eulálio, M. do C. Resiliência para uma velhice bem-sucedida: mecanismos sociais e recursos pessoais de proteção. *Psicologia: ciência e profissão* **2022**, 42. <https://doi.org/10.1590/1982-3703003234261>
- R22** Cesari, M.; Azzolino, D.; LeBrasseur, N. K.; Whitson, H.; Rooks, D.; Sourdet, S.; Angioni, D.; Fielding, R. A.; Vellas, B.; Rolland, Y. Resilience: biological basis and clinical significance - a perspective report from the International Conference on Frailty and Sarcopenia Research (ICFSR) Task Force. *J Frailty Aging*. **2022** <https://doi.org/10.14283/jfa.2022.62>
- S1** Smith, J. L.; Hollinger-Smith, L. Savoring, resilience, and psychological well-being in older adults. *Aging Ment Health* **2014**, 19(3), 192–200. <https://doi.org/10.1080/13607863.2014.986647>
- S2** Hölzge, J.; Mc Gee, S. L.; Maercker, A.; Thoma, M. V. Steeling in later life: exploring age-specific effects of varying levels of stress on psychological resilience. *Int J Aging Hum Dev* **2019**, <https://doi.org/10.1177/0091415019871202>
- S3** Qi, X.; Zhang, W.; Wang, K.; Pei, Y.; Wu, B. Social isolation and psychological well-being among older chinese americans: does resilience mediate the association? *Int J Geriatr Psychiatry* **2022**, 37(8). <https://doi.org/10.1002/gps.5791>
- S4** Whitmore, C.; Markle-Reid, M.; McAiney, C.; Ploeg, J.; Griffith, L. E.; Phillips, S. P.; Wister, A.; Fisher, K. Self-reported health and the well-being paradox among community-dwelling older adults: a cross-sectional study using baseline data from the Canadian Longitudinal Study on Aging (CLSA). *BMC Geriatrics* **2022**, 22(1). <https://doi.org/10.1186/s12877-022-02807-z>
- S5** Siltanen, S.; Portegijs, E.; Saajanaho, M.; Pynnönen, K.; Kokko, K.; Rantanen, T. Self-rated resilience and mobility limitations as predictors of change in active aging during COVID-19 restrictions in Finland: a longitudinal study. *Eur J Ageing* **2021**, 19(3), 475–484. <https://doi.org/10.1007/s10433-021-00634-6>
- T1** Cohen, M.; Baziliansky, S.; Beny, A. The association of resilience and age in individuals with colorectal cancer: an exploratory cross-sectional study. *J Geriatr Oncol* **2014**, 5(1), 33–39. <https://doi.org/10.1016/j.jgo.2013.07.009>
- T2** Meléndez, J. C.; Fortuna, F. B.; Sales, A.; Mayordomo, T. The effects of instrumental reminiscence on resilience and coping in elderly. *Archives of Gerontology and Geriatrics* **2015**, 60(2), 294–298. <https://doi.org/10.1016/j.archger.2014.12.001>
- T3** Metze, R. N., Kwekkeboom, R. H., & Abma, T. A. (2015). The potential of family group conferencing for the resilience and relational autonomy of older adults. *Journal of Aging Studies*, 34, 68–81. <https://doi.org/10.1016/j.jaging.2015.04.005>
- T4** Resnick, B. A., & Inguito, P. L. (2011). The Resilience Scale: psychometric properties and clinical applicability in older adults. *Archives of Psychiatric Nursing*, 25(1), 11–20. <https://doi.org/10.1016/j.apnu.2010.05.001>

**T5** Abulaiti, B., Zhang, X., Guan, T., Wang, M., Jia, S., & Wang, A. (2022). The dyadic care experiences of elderly individuals with disabilities and caregivers in the home setting from the perspective of family resilience: a qualitative study. *Frontiers in Psychiatry*, 13. <https://doi.org/10.3389/fpsyt.2022.963101>

**T6** Klokgieters, S. S., van Tilburg, T. G., Deeg, D. J. H., & Huisman, M. (2018). The linkage between ageing, migration and resilience: resilience among young-old Turkish and Moroccan immigrants. *Innovation in Aging*, 2(suppl1), 70–70. <https://doi.org/10.1093/geroni/igy023.262>

**U1** Hildon, Z., Smith, G., Netuveli, G., & Blane, D. (2008). Understanding adversity and resilience at older ages. *Sociology of Health & Illness*, 30(5), 726–740. <https://doi.org/10.1111/j.1467-9566.2008.01087.x>

**U2** Palma-Candia, O., Hueso Montoro, C., Martí-García, C., Fernández-Alcántara, M., Campos-Calderón, C. P., & Montoya Juárez, R. (2019). Understanding the occupational adaptation process and well-being of older adults in Magallanes (Chile): a qualitative study. *International Journal of Environmental Research and Public Health*, 16(19). <https://doi.org/10.3390/ijerph16193640>

**V1** Dolores Serrano-Parra, M.; Garrido-Abejar, M.; Notario-Pacheco, B.; Bartolomé-Gutiérrez, R.; Solera-Martínez, M.; Martínez-Vizcaíno, V. Validez de la escala de resiliencia de Connor-Davidson (10 ítems) en una población de mayores no institucionalizados. *Enferm Clin* **2013**, 23(1), 14–21. <https://doi.org/10.1016/j.enfcli.2012.11.006>

**W1** Donnellan, W. J.; Bennett, K. M.; Soulsby, L. K. What are the factors that facilitate or hinder resilience in older spousal dementia carers? A qualitative study. *Aging Ment Health* **2014**, 19(10), 932–939. <https://doi.org/10.1080/13607863.2014.977771>

**W2** Krause, B.; Vlasova, R.; Leaver, A.; Laird, K. T.; Siddarth, P.; Narr, K.; Lavretsky, H. White matter integrity in the corpus callosum is associated with resilience factors in geriatric depression. *Am J Geriatr Psychiatry* **2018**, 26(3), S117. <https://doi.org/10.1016/j.jagp.2018.01.142>
